# Supplementary material
Source: publisher figshare collection journal article supplement (https://acs.figshare.com/ndownloader/files/4259917)
Supplement: Supplementary file 1 [file 4259917]

 
data_c7ch19-100kfsq 
 
_audit_creation_method            SHELXL-97 
_chemical_name_systematic 
; 
 ? 
; 
_chemical_name_common             ? 
_chemical_melting_point           ? 
_chemical_formula_moiety          ? 
_chemical_formula_sum 
 'C40 H26 Cd I2 N8' 
# Based on the model without the disordered solvent molecules
_chemical_formula_weight          984.89 
 
loop_ 
 _atom_type_symbol 
 _atom_type_description 
 _atom_type_scat_dispersion_real 
 _atom_type_scat_dispersion_imag 
 _atom_type_scat_source 
 'C'  'C'   0.0033   0.0016 
 'International Tables Vol C Tables 4.2.6.8 and 6.1.1.4' 
 'H'  'H'   0.0000   0.0000 
 'International Tables Vol C Tables 4.2.6.8 and 6.1.1.4' 
 'N'  'N'   0.0061   0.0033 
 'International Tables Vol C Tables 4.2.6.8 and 6.1.1.4' 
 'I'  'I'  -0.4742   1.8119 
 'International Tables Vol C Tables 4.2.6.8 and 6.1.1.4' 
 'Cd'  'Cd'  -0.8075   1.2024 
 'International Tables Vol C Tables 4.2.6.8 and 6.1.1.4' 
 
_symmetry_cell_setting           'Orthorhombic'
_symmetry_space_group_name_H-M   'P n n m '
 
loop_ 
 _symmetry_equiv_pos_as_xyz 
 'x, y, z' 
 '-x, -y, z' 
 '-x+1/2, y+1/2, -z+1/2' 
 'x+1/2, -y+1/2, -z+1/2' 
 '-x, -y, -z' 
 'x, y, -z' 
 'x-1/2, -y-1/2, z-1/2' 
 '-x-1/2, y-1/2, z-1/2' 
 
_cell_length_a                    8.7268(10) 
_cell_length_b                    18.294(2) 
_cell_length_c                    20.348(2) 
_cell_angle_alpha                 90.00 
_cell_angle_beta                  90.00 
_cell_angle_gamma                 90.00 
_cell_volume                      3248.6(6) 
_cell_formula_units_Z             2 
_cell_measurement_temperature     100(2) 
_cell_measurement_reflns_used    6896
_cell_measurement_theta_min        2.54
_cell_measurement_theta_max       25.98

_exptl_crystal_description       'needle'
_exptl_crystal_colour            'red'
_exptl_crystal_size_max           0.60 
_exptl_crystal_size_mid           0.10 
_exptl_crystal_size_min           0.08 
_exptl_crystal_density_meas       ? 
_exptl_crystal_density_diffrn     1.007 
# Based on the model without the disordered solvent molecules
_exptl_crystal_density_method     'not measured' 
_exptl_crystal_F_000              952 
_exptl_absorpt_coefficient_mu     1.310 
_exptl_absorpt_correction_type    numerical 
_exptl_absorpt_correction_T_min   0.5071 
_exptl_absorpt_correction_T_max   0.9025 
_exptl_absorpt_process_details    SADABS 

loop_
 _exptl_crystal_face_index_h
 _exptl_crystal_face_index_k
 _exptl_crystal_face_index_l
 _exptl_crystal_face_perp_dist
    1.00    0.00    0.00    0.0400
   -1.00    0.00    0.00    0.0400
    0.00    1.00    0.00    0.0500
    0.00   -1.00    0.00    0.0500
    0.00    0.00    1.00    0.3000
    0.00    0.00   -1.00    0.3000
 
_exptl_special_details 
; 
; 
 
_diffrn_ambient_temperature       100(2) 
_diffrn_radiation_wavelength      0.71073 
_diffrn_radiation_type            MoK\a 
_diffrn_radiation_source          'fine-focus sealed tube' 
_diffrn_radiation_monochromator   graphite 
_diffrn_measurement_device_type  'Bruker SMART APEX CCD area detector'
_diffrn_measurement_method       'omega scans'
_diffrn_detector_area_resol_mean  ? 
_diffrn_reflns_number             31802 
_diffrn_reflns_av_R_equivalents   0.0375 
_diffrn_reflns_av_sigmaI/netI     0.0184 
_diffrn_reflns_limit_h_min        -10 
_diffrn_reflns_limit_h_max        10 
_diffrn_reflns_limit_k_min        -22 
_diffrn_reflns_limit_k_max        22 
_diffrn_reflns_limit_l_min        -25 
_diffrn_reflns_limit_l_max        25 
_diffrn_reflns_theta_min          1.50 
_diffrn_reflns_theta_max          26.02 
_reflns_number_total              3295 
_reflns_number_gt                 2820 
_reflns_threshold_expression      >2sigma(I) 
 
_computing_data_collection      'Bruker SMART'
_computing_cell_refinement      'Bruker SMART'
_computing_data_reduction       'Bruker SAINT'
_computing_structure_solution   'Bruker SHELXTL'
_computing_structure_refinement 'Bruker SHELXTL'
_computing_molecular_graphics   'Bruker SHELXTL'
_computing_publication_material 'Bruker SHELXTL'
 
_refine_special_details 
; 
 Refinement of F^2^ against ALL reflections.  The weighted R-factor wR and 
 goodness of fit S are based on F^2^, conventional R-factors R are based 
 on F, with F set to zero for negative F^2^. The threshold expression of 
 F^2^ > 2sigma(F^2^) is used only for calculating R-factors(gt) etc. and is 
 not relevant to the choice of reflections for refinement.  R-factors based 
 on F^2^ are statistically about twice as large as those based on F, and R- 
 factors based on ALL data will be even larger. 
; 
 
_refine_ls_structure_factor_coef  Fsqd  
_refine_ls_matrix_type            full 
_refine_ls_weighting_scheme       calc  
_refine_ls_weighting_details 
 'calc w=1/[\s^2^(Fo^2^)+(0.0843P)^2^+1.8374P] where P=(Fo^2^+2Fc^2^)/3' 
_atom_sites_solution_primary      direct 
_atom_sites_solution_secondary    difmap 
_atom_sites_solution_hydrogens    geom 
_refine_ls_hydrogen_treatment     constr 
_refine_ls_extinction_method      none 
_refine_ls_extinction_coef        ? 
_refine_ls_number_reflns          3295 
_refine_ls_number_parameters      143 
_refine_ls_number_restraints      79 
_refine_ls_R_factor_all           0.0500 
_refine_ls_R_factor_gt            0.0425 
_refine_ls_wR_factor_ref          0.1248 
_refine_ls_wR_factor_gt           0.1203 
_refine_ls_goodness_of_fit_ref    1.044 
_refine_ls_restrained_S_all       1.112 
_refine_ls_shift/su_max           0.000 
_refine_ls_shift/su_mean          0.000 
 
loop_ 
 _atom_site_label 
 _atom_site_type_symbol 
 _atom_site_fract_x 
 _atom_site_fract_y 
 _atom_site_fract_z 
 _atom_site_U_iso_or_equiv 
 _atom_site_adp_type 
 _atom_site_occupancy 
 _atom_site_symmetry_multiplicity 
 _atom_site_calc_flag 
 _atom_site_refinement_flags 
 _atom_site_disorder_assembly 
 _atom_site_disorder_group 
Cd Cd 0.0000 0.0000 0.5000 0.03028(17) Uani 1 4 d S . . 
I I -0.29950(5) 0.07437(2) 0.5000 0.05662(18) Uani 1 2 d SU . . 
N1 N 0.4240(4) 0.42979(16) 0.57203(16) 0.0413(7) Uani 1 1 d U . . 
H1 H 0.4544 0.4608 0.5417 0.050 Uiso 0.50 1 calc PR . . 
N2 N 0.5000 0.5000 0.8810(2) 0.0396(10) Uani 1 2 d S . . 
N3 N 0.1276(5) 0.1168(2) 0.5000 0.0301(8) Uani 1 2 d S . . 
C1 C 0.3587(5) 0.36270(19) 0.56120(19) 0.0438(9) Uani 1 1 d . . . 
C2 C 0.3254(6) 0.3300(2) 0.6237(2) 0.0534(10) Uani 1 1 d U . . 
H2 H 0.2791 0.2836 0.6306 0.064 Uiso 1 1 calc R . . 
C3 C 0.3714(6) 0.3768(2) 0.6705(2) 0.0552(11) Uani 1 1 d U . . 
H3 H 0.3640 0.3694 0.7166 0.066 Uiso 1 1 calc R . . 
C4 C 0.4334(5) 0.4398(2) 0.6385(2) 0.0451(9) Uani 1 1 d U . . 
C5 C 0.5000 0.5000 0.6706(3) 0.0443(12) Uani 1 2 d SU . . 
C6 C 0.5000 0.5000 0.7434(3) 0.0458(12) Uani 1 2 d SU . . 
C7 C 0.3636(6) 0.5019(3) 0.7785(2) 0.0566(11) Uani 1 1 d U . . 
H7 H 0.2680 0.5035 0.7562 0.068 Uiso 1 1 calc R . . 
C8 C 0.3690(6) 0.5016(2) 0.8469(2) 0.0536(11) Uani 1 1 d . . . 
H8 H 0.2751 0.5025 0.8705 0.064 Uiso 1 1 calc R . . 
C9 C 0.3293(6) 0.3314(3) 0.5000 0.0384(11) Uani 1 2 d SU . . 
C10 C 0.2609(6) 0.2551(3) 0.5000 0.0372(11) Uani 1 2 d SU . . 
C11 C 0.3350(8) 0.1986(4) 0.4812(3) 0.0350(16) Uani 0.50 1 d PU . . 
H11 H 0.4380 0.2045 0.4670 0.042 Uiso 0.50 1 calc PR . . 
C12 C 0.2715(8) 0.1290(4) 0.4805(3) 0.0363(17) Uani 0.50 1 d PU . . 
H12 H 0.3320 0.0890 0.4658 0.044 Uiso 0.50 1 calc PR . . 
C13 C 0.0502(9) 0.1737(4) 0.5252(4) 0.0419(17) Uani 0.50 1 d PU . . 
H13 H -0.0491 0.1657 0.5429 0.050 Uiso 0.50 1 calc PR . . 
C14 C 0.1114(9) 0.2446(4) 0.5263(4) 0.0456(18) Uani 0.50 1 d PU . . 
H14 H 0.0548 0.2843 0.5441 0.055 Uiso 0.50 1 calc PR . . 
 
loop_ 
 _atom_site_aniso_label 
 _atom_site_aniso_U_11 
 _atom_site_aniso_U_22 
 _atom_site_aniso_U_33 
 _atom_site_aniso_U_23 
 _atom_site_aniso_U_13 
 _atom_site_aniso_U_12 
Cd 0.0352(3) 0.0187(3) 0.0370(3) 0.000 0.000 -0.00486(18) 
I 0.0425(3) 0.0329(2) 0.0945(4) 0.000 0.000 0.00013(15) 
N1 0.0542(18) 0.0265(13) 0.0431(15) 0.0019(11) -0.0015(13) -0.0092(13) 
N2 0.047(3) 0.029(2) 0.043(2) 0.000 0.000 0.0024(18) 
N3 0.036(2) 0.0207(18) 0.034(2) 0.000 0.000 -0.0036(16) 
C1 0.057(2) 0.0250(18) 0.050(2) 0.0018(15) 0.0035(18) -0.0085(16) 
C2 0.070(2) 0.0385(18) 0.0514(19) 0.0013(16) 0.0043(17) -0.0177(17) 
C3 0.076(2) 0.0400(18) 0.0494(19) 0.0027(15) 0.0030(18) -0.0157(18) 
C4 0.058(2) 0.0345(17) 0.0432(17) 0.0018(14) 0.0013(16) -0.0098(16) 
C5 0.053(2) 0.036(2) 0.044(2) 0.000 0.000 -0.0082(19) 
C6 0.058(2) 0.034(2) 0.045(2) 0.000 0.000 -0.007(2) 
C7 0.062(3) 0.060(3) 0.048(2) 0.004(2) -0.0041(18) -0.006(2) 
C8 0.060(3) 0.054(3) 0.047(2) 0.0056(19) -0.001(2) 0.000(2) 
C9 0.040(2) 0.028(2) 0.047(2) 0.000 0.000 -0.0051(18) 
C10 0.039(2) 0.032(2) 0.041(2) 0.000 0.000 -0.0083(18) 
C11 0.034(2) 0.034(3) 0.037(3) -0.0012(19) 0.0074(19) -0.005(2) 
C12 0.036(3) 0.029(2) 0.043(3) -0.0005(19) 0.001(2) -0.003(2) 
C13 0.039(3) 0.036(3) 0.050(3) -0.006(2) 0.006(2) -0.005(2) 
C14 0.045(3) 0.037(3) 0.055(3) -0.007(2) 0.006(2) 0.000(2) 
 
_geom_special_details 
; 
 All esds (except the esd in the dihedral angle between two l.s. planes) 
 are estimated using the full covariance matrix.  The cell esds are taken 
 into account individually in the estimation of esds in distances, angles 
 and torsion angles; correlations between esds in cell parameters are only 
 used when they are defined by crystal symmetry.  An approximate (isotropic) 
 treatment of cell esds is used for estimating esds involving l.s. planes. 
; 
 
loop_ 
 _geom_bond_atom_site_label_1 
 _geom_bond_atom_site_label_2 
 _geom_bond_distance 
 _geom_bond_site_symmetry_2 
 _geom_bond_publ_flag 
Cd N3 2.409(4) 5_556 ? 
Cd N3 2.409(4) . ? 
Cd N2 2.421(4) 7_565 ? 
Cd N2 2.421(4) 3_546 ? 
Cd I 2.9466(5) 5_556 ? 
Cd I 2.9466(5) . ? 
N1 C4 1.367(5) . ? 
N1 C1 1.371(5) . ? 
N1 H1 0.8800 . ? 
N2 C8 1.338(5) . ? 
N2 C8 1.338(5) 2_665 ? 
N2 Cd 2.421(4) 3_556 ? 
N3 C12 1.336(8) 6_556 ? 
N3 C12 1.336(8) . ? 
N3 C13 1.344(9) . ? 
N3 C13 1.344(9) 6_556 ? 
C1 C9 1.395(5) . ? 
C1 C2 1.434(6) . ? 
C2 C3 1.343(6) . ? 
C2 H2 0.9500 . ? 
C3 C4 1.430(6) . ? 
C3 H3 0.9500 . ? 
C4 C5 1.407(5) . ? 
C5 C4 1.407(5) 2_665 ? 
C5 C6 1.480(8) . ? 
C6 C7 1.389(6) . ? 
C6 C7 1.389(6) 2_665 ? 
C7 C8 1.393(6) . ? 
C7 H7 0.9500 . ? 
C8 H8 0.9500 . ? 
C9 C1 1.395(5) 6_556 ? 
C9 C10 1.517(7) . ? 
C10 C11 1.279(9) . ? 
C10 C11 1.279(9) 6_556 ? 
C10 C14 1.424(9) 6_556 ? 
C10 C14 1.424(9) . ? 
C11 C12 1.389(9) . ? 
C11 H11 0.9500 . ? 
C12 H12 0.9500 . ? 
C13 C14 1.402(11) . ? 
C13 H13 0.9500 . ? 
C14 H14 0.9500 . ? 
 
loop_ 
 _geom_angle_atom_site_label_1 
 _geom_angle_atom_site_label_2 
 _geom_angle_atom_site_label_3 
 _geom_angle 
 _geom_angle_site_symmetry_1 
 _geom_angle_site_symmetry_3 
 _geom_angle_publ_flag 
N3 Cd N3 180.0 5_556 . ? 
N3 Cd N2 90.0 5_556 7_565 ? 
N3 Cd N2 90.0 . 7_565 ? 
N3 Cd N2 90.0 5_556 3_546 ? 
N3 Cd N2 90.0 . 3_546 ? 
N2 Cd N2 180.0 7_565 3_546 ? 
N3 Cd I 90.03(10) 5_556 5_556 ? 
N3 Cd I 89.97(10) . 5_556 ? 
N2 Cd I 90.0 7_565 5_556 ? 
N2 Cd I 90.0 3_546 5_556 ? 
N3 Cd I 89.97(10) 5_556 . ? 
N3 Cd I 90.03(10) . . ? 
N2 Cd I 90.0 7_565 . ? 
N2 Cd I 90.0 3_546 . ? 
I Cd I 180.0 5_556 . ? 
C4 N1 C1 107.7(3) . . ? 
C4 N1 H1 126.2 . . ? 
C1 N1 H1 126.2 . . ? 
C8 N2 C8 117.4(5) . 2_665 ? 
C8 N2 Cd 121.3(3) . 3_556 ? 
C8 N2 Cd 121.3(3) 2_665 3_556 ? 
C12 N3 C13 117.2(5) . . ? 
C12 N3 C13 117.2(5) 6_556 6_556 ? 
C12 N3 Cd 125.6(4) 6_556 . ? 
C12 N3 Cd 125.6(4) . . ? 
C13 N3 Cd 117.1(4) . . ? 
C13 N3 Cd 117.1(4) 6_556 . ? 
N1 C1 C9 126.0(4) . . ? 
N1 C1 C2 108.4(3) . . ? 
C9 C1 C2 125.6(4) . . ? 
C3 C2 C1 107.6(4) . . ? 
C3 C2 H2 126.2 . . ? 
C1 C2 H2 126.2 . . ? 
C2 C3 C4 107.6(4) . . ? 
C2 C3 H3 126.2 . . ? 
C4 C3 H3 126.2 . . ? 
N1 C4 C5 126.1(4) . . ? 
N1 C4 C3 108.7(3) . . ? 
C5 C4 C3 125.1(4) . . ? 
C4 C5 C4 124.6(5) . 2_665 ? 
C4 C5 C6 117.7(3) . . ? 
C4 C5 C6 117.7(3) 2_665 . ? 
C7 C6 C7 118.1(6) . 2_665 ? 
C7 C6 C5 121.0(3) . . ? 
C7 C6 C5 121.0(3) 2_665 . ? 
C6 C7 C8 119.0(5) . . ? 
C6 C7 H7 120.5 . . ? 
C8 C7 H7 120.5 . . ? 
N2 C8 C7 123.2(5) . . ? 
N2 C8 H8 118.4 . . ? 
C7 C8 H8 118.4 . . ? 
C1 C9 C1 126.5(5) . 6_556 ? 
C1 C9 C10 116.8(2) . . ? 
C1 C9 C10 116.8(2) 6_556 . ? 
C11 C10 C14 117.8(6) 6_556 6_556 ? 
C11 C10 C14 117.8(6) . . ? 
C11 C10 C9 123.0(5) . . ? 
C11 C10 C9 123.0(5) 6_556 . ? 
C14 C10 C9 119.0(5) 6_556 . ? 
C14 C10 C9 119.0(5) . . ? 
C10 C11 C12 122.9(6) . . ? 
C10 C11 H11 118.5 . . ? 
C12 C11 H11 118.5 . . ? 
N3 C12 C11 121.7(6) . . ? 
N3 C12 H12 119.2 . . ? 
C11 C12 H12 119.2 . . ? 
N3 C13 C14 122.1(7) . . ? 
N3 C13 H13 118.9 . . ? 
C14 C13 H13 118.9 . . ? 
C13 C14 C10 117.9(7) . . ? 
C13 C14 H14 121.0 . . ? 
C10 C14 H14 121.0 . . ? 
 
_diffrn_measured_fraction_theta_max    0.999 
_diffrn_reflns_theta_full              26.02 
_diffrn_measured_fraction_theta_full   0.999 
_refine_diff_density_max    1.871 
_refine_diff_density_min   -0.897 
_refine_diff_density_rms    0.111 


loop_ 
 _publ_author_name 
 _publ_author_address 
'Hu, Chunhua' 
; 
New York University
Department of Chemistry
100 Washington Square East Room 1001
New York, NY 10003-6688
USA 
; 

# start Validation Reply Form


_vrf_PLAT602_c7ch19-100kfsq
;
PROBLEM: VERY LARGE Solvent Accessible VOID(S) in Structure    
RESPONSE: The voids are occupied by the disordered solvent molecules.
Their contributions in the structure are removed by the PLATON/SQUEEZE.
;

_vrf_PLAT094_c7ch19-100kfsq
;
PROBLEM: Ratio of Maximum / Minimum Residual Density ....       2.09 
RESPONSE: The largest residual peak is 0.29 Ang. from Cd atom.
;

# end Validation Reply Form
